# Supplementary material for: Dopamine modulation of motor and implicit learning contributions to auditory temporal attention
Source: Research Square preprint supplement (doi:10.21203/rs.3.rs-7301023/v1), 2025-09-01
Supplement: Supplementary file 1 [file f5d7bc4447049aa142e0d233.docx]

Supplementary Materials for

**Dopamine modulation of motor and implicit learning contributions to auditory temporal attention**

Arnaud Zalta, Lena-Franziska Spitz, Alfons Schnitzler, Benjamin Morillon and Esther Florin

Corresponding authors: arnaud.zalta@gmail.com

**The PDF file includes:**

Figs. S1


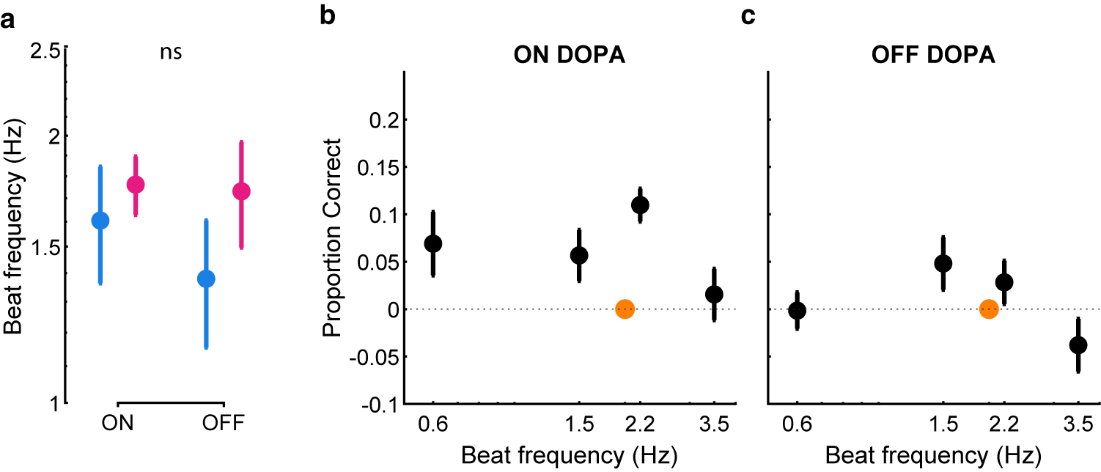


**Supplementary figure 1. a.** Individual estimates of the optimal tempo of auditory temporal attention in the passive (pale blue) and tracking (pink) conditions for PD patients ON or OFF-DOPA medication. **b**. Impact of tracking on performance in PD patients ON-DOPA medication. Difference in performance between the tracking and the passive condition for each tempo. **c.** Same as (b) but for the performance of PD patients OFF-DOPA medication. *p < 0.05; ns: non-significant.
